# Supplementary material for: Strength Training Rehabilitation Incorporating Power Exercises (STRIPE) for individuals with patellofemoral pain: a randomised controlled trial protocol
Source: HighWire-hosted journal article supplement (doi:10.1136/bmjsem-2022-001482), 2023-01-01
Supplement: bmjsem-2022-001482supp001_data_supplement.pdf [file bmjsem-2022-001482supp001_data_supplement.pdf]

**Supplementary File 1: SPIRIT Checklist**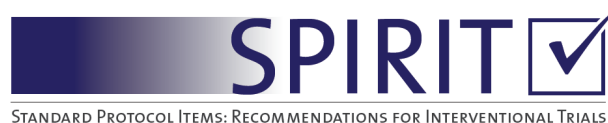

SPIRIT 2013 Checklist: Recommended items to address in a clinical trial protocol and related documents\*

| <b>Section/item</b>               | <b>Item No</b> | <b>Description</b>                                                                                                                                                                                                                                                                       | <b>Addressed on page number</b> |
|-----------------------------------|----------------|------------------------------------------------------------------------------------------------------------------------------------------------------------------------------------------------------------------------------------------------------------------------------------------|---------------------------------|
| <b>Administrative information</b> |                |                                                                                                                                                                                                                                                                                          |                                 |
| Title                             | 1              | Descriptive title identifying the study design, population, interventions, and, if applicable, trial acronym                                                                                                                                                                             | <a href="#">Page 1</a>          |
| Trial registration                | 2a             | Trial identifier and registry name. If not yet registered, name of intended registry                                                                                                                                                                                                     | <a href="#">Page 3/7</a>        |
|                                   | 2b             | All items from the World Health Organization Trial Registration Data Set                                                                                                                                                                                                                 | <a href="#">Page 3/7</a>        |
| Protocol version                  | 3              | Date and version identifier                                                                                                                                                                                                                                                              | <a href="#">Page 1</a>          |
| Funding                           | 4              | Sources and types of financial, material, and other support                                                                                                                                                                                                                              | <a href="#">Page 1</a>          |
| Roles and responsibilities        | 5a             | Names, affiliations, and roles of protocol contributors                                                                                                                                                                                                                                  | <a href="#">Page 1</a>          |
|                                   | 5b             | Name and contact information for the trial sponsor                                                                                                                                                                                                                                       | <a href="#">Page 1</a>          |
|                                   | 5c             | Role of study sponsor and funders, if any, in study design; collection, management, analysis, and interpretation of data; writing of the report; and the decision to submit the report for publication, including whether they will have ultimate authority over any of these activities | <a href="#">Page 1</a>          |

- 5d Composition, roles, and responsibilities of the coordinating centre, steering committee, endpoint adjudication committee, data management team, and other individuals or groups overseeing the trial, if applicable (see Item 21a for data monitoring committee) [Page 1](#)

### Introduction

- Background and rationale 6a Description of research question and justification for undertaking the trial, including summary of relevant studies (published and unpublished) examining benefits and harms for each intervention [Page 5-7](#)
- 6b Explanation for choice of comparators [Page 6-7](#)
- Objectives 7 Specific objectives or hypotheses [Pages 6-7](#)
- Trial design 8 Description of trial design including type of trial (eg, parallel group, crossover, factorial, single group), allocation ratio, and framework (eg, superiority, equivalence, noninferiority, exploratory) [Page 8](#)

### Methods: Participants, interventions, and outcomes

- Study setting 9 Description of study settings (eg, community clinic, academic hospital) and list of countries where data will be collected. Reference to where list of study sites can be obtained [Page 8](#)
- Eligibility criteria 10 Inclusion and exclusion criteria for participants. If applicable, eligibility criteria for study centres and individuals who will perform the interventions (eg, surgeons, psychotherapists) [Page 8-9, Table 1](#)
- Interventions 11a Interventions for each group with sufficient detail to allow replication, including how and when they will be administered [Page 9-11, Table 2 Supp 2-4](#)

|                      |     |                                                                                                                                                                                                                                                                                                                                                                                |                                        |
|----------------------|-----|--------------------------------------------------------------------------------------------------------------------------------------------------------------------------------------------------------------------------------------------------------------------------------------------------------------------------------------------------------------------------------|----------------------------------------|
|                      | 11b | Criteria for discontinuing or modifying allocated interventions for a given trial participant (eg, drug dose change in response to harms, participant request, or improving/worsening disease)                                                                                                                                                                                 | <a href="#">Page 8</a>                 |
|                      | 11c | Strategies to improve adherence to intervention protocols, and any procedures for monitoring adherence (eg, drug tablet return, laboratory tests)                                                                                                                                                                                                                              | <a href="#">Page 10-11</a>             |
|                      | 11d | Relevant concomitant care and interventions that are permitted or prohibited during the trial                                                                                                                                                                                                                                                                                  | <a href="#">Page 12, 13 and 15</a>     |
| Outcomes             | 12  | Primary, secondary, and other outcomes, including the specific measurement variable (eg, systolic blood pressure), analysis metric (eg, change from baseline, final value, time to event), method of aggregation (eg, median, proportion), and time point for each outcome. Explanation of the clinical relevance of chosen efficacy and harm outcomes is strongly recommended | <a href="#">Page 11-14</a>             |
| Participant timeline | 13  | Time schedule of enrolment, interventions (including any run-ins and washouts), assessments, and visits for participants. A schematic diagram is highly recommended (see Figure)                                                                                                                                                                                               | <a href="#">Page 11-12 and Table 3</a> |
| Sample size          | 14  | Estimated number of participants needed to achieve study objectives and how it was determined, including clinical and statistical assumptions supporting any sample size calculations                                                                                                                                                                                          | <a href="#">Page 15-17</a>             |
| Recruitment          | 15  | Strategies for achieving adequate participant enrolment to reach target sample size                                                                                                                                                                                                                                                                                            | <a href="#">Page 8</a>                 |

**Methods: Assignment of interventions (for controlled trials)**

Allocation:

|                                  |     |                                                                                                                                                                                                                                                                                                                                                          |                          |
|----------------------------------|-----|----------------------------------------------------------------------------------------------------------------------------------------------------------------------------------------------------------------------------------------------------------------------------------------------------------------------------------------------------------|--------------------------|
| Sequence generation              | 16a | Method of generating the allocation sequence (eg, computer-generated random numbers), and list of any factors for stratification. To reduce predictability of a random sequence, details of any planned restriction (eg, blocking) should be provided in a separate document that is unavailable to those who enrol participants or assign interventions | <a href="#">Page 8-9</a> |
| Allocation concealment mechanism | 16b | Mechanism of implementing the allocation sequence (eg, central telephone; sequentially numbered, opaque, sealed envelopes), describing any steps to conceal the sequence until interventions are assigned                                                                                                                                                | <a href="#">Page 8-9</a> |
| Implementation                   | 16c | Who will generate the allocation sequence, who will enrol participants, and who will assign participants to interventions                                                                                                                                                                                                                                | <a href="#">Page 8-9</a> |
| Blinding (masking)               | 17a | Who will be blinded after assignment to interventions (eg, trial participants, care providers, outcome assessors, data analysts), and how                                                                                                                                                                                                                | <a href="#">Page 8-9</a> |
|                                  | 17b | If blinded, circumstances under which unblinding is permissible, and procedure for revealing a participant's allocated intervention during the trial                                                                                                                                                                                                     | <a href="#">Page 8-9</a> |

**Methods: Data collection, management, and analysis**

|                         |     |                                                                                                                                                                                                                                                                                                                                                                                                              |                               |
|-------------------------|-----|--------------------------------------------------------------------------------------------------------------------------------------------------------------------------------------------------------------------------------------------------------------------------------------------------------------------------------------------------------------------------------------------------------------|-------------------------------|
| Data collection methods | 18a | Plans for assessment and collection of outcome, baseline, and other trial data, including any related processes to promote data quality (eg, duplicate measurements, training of assessors) and a description of study instruments (eg, questionnaires, laboratory tests) along with their reliability and validity, if known. Reference to where data collection forms can be found, if not in the protocol | <a href="#">Page 9 and 18</a> |
|                         | 18b | Plans to promote participant retention and complete follow-up, including list of any outcome data to be collected for participants who discontinue or deviate from intervention protocols                                                                                                                                                                                                                    | <a href="#">Page 13</a>       |

|                            |     |                                                                                                                                                                                                                                                                                                                                       |                                |
|----------------------------|-----|---------------------------------------------------------------------------------------------------------------------------------------------------------------------------------------------------------------------------------------------------------------------------------------------------------------------------------------|--------------------------------|
| Data management            | 19  | Plans for data entry, coding, security, and storage, including any related processes to promote data quality (eg, double data entry; range checks for data values). Reference to where details of data management procedures can be found, if not in the protocol                                                                     | <a href="#">Page 14 and 15</a> |
| Statistical methods        | 20a | Statistical methods for analysing primary and secondary outcomes. Reference to where other details of the statistical analysis plan can be found, if not in the protocol                                                                                                                                                              | <a href="#">Page 17</a>        |
|                            | 20b | Methods for any additional analyses (eg, subgroup and adjusted analyses)                                                                                                                                                                                                                                                              | <a href="#">N/A</a>            |
|                            | 20c | Definition of analysis population relating to protocol non-adherence (eg, as randomised analysis), and any statistical methods to handle missing data (eg, multiple imputation)                                                                                                                                                       | <a href="#">Page 17</a>        |
| <b>Methods: Monitoring</b> |     |                                                                                                                                                                                                                                                                                                                                       |                                |
| Data monitoring            | 21a | Composition of data monitoring committee (DMC); summary of its role and reporting structure; statement of whether it is independent from the sponsor and competing interests; and reference to where further details about its charter can be found, if not in the protocol. Alternatively, an explanation of why a DMC is not needed | <a href="#">Page 18-19</a>     |
|                            | 21b | Description of any interim analyses and stopping guidelines, including who will have access to these interim results and make the final decision to terminate the trial                                                                                                                                                               | <a href="#">Page 18-19</a>     |
| Harms                      | 22  | Plans for collecting, assessing, reporting, and managing solicited and spontaneously reported adverse events and other unintended effects of trial interventions or trial conduct                                                                                                                                                     | <a href="#">Page 18-19</a>     |
| Auditing                   | 23  | Frequency and procedures for auditing trial conduct, if any, and whether the process will be independent from investigators and the sponsor                                                                                                                                                                                           | <a href="#">Page 18-19</a>     |

**Ethics and dissemination**

|                               |     |                                                                                                                                                                                                                                                                                     |                            |
|-------------------------------|-----|-------------------------------------------------------------------------------------------------------------------------------------------------------------------------------------------------------------------------------------------------------------------------------------|----------------------------|
| Research ethics approval      | 24  | Plans for seeking research ethics committee/institutional review board (REC/IRB) approval                                                                                                                                                                                           | <a href="#">Page 18</a>    |
| Protocol amendments           | 25  | Plans for communicating important protocol modifications (eg, changes to eligibility criteria, outcomes, analyses) to relevant parties (eg, investigators, REC/IRBs, trial participants, trial registries, journals, regulators)                                                    | <a href="#">Page 18</a>    |
| Consent or assent             | 26a | Who will obtain informed consent or assent from potential trial participants or authorised surrogates, and how (see Item 32)                                                                                                                                                        | <a href="#">Page 9</a>     |
|                               | 26b | Additional consent provisions for collection and use of participant data and biological specimens in ancillary studies, if applicable                                                                                                                                               | <a href="#">N/A</a>        |
| Confidentiality               | 27  | How personal information about potential and enrolled participants will be collected, shared, and maintained in order to protect confidentiality before, during, and after the trial                                                                                                | <a href="#">Page 18-19</a> |
| Declaration of interests      | 28  | Financial and other competing interests for principal investigators for the overall trial and each study site                                                                                                                                                                       | <a href="#">Page 1</a>     |
| Access to data                | 29  | Statement of who will have access to the final trial dataset, and disclosure of contractual agreements that limit such access for investigators                                                                                                                                     | <a href="#">Page 19</a>    |
| Ancillary and post-trial care | 30  | Provisions, if any, for ancillary and post-trial care, and for compensation to those who suffer harm from trial participation                                                                                                                                                       | <a href="#">Page 19</a>    |
| Dissemination policy          | 31a | Plans for investigators and sponsor to communicate trial results to participants, healthcare professionals, the public, and other relevant groups (eg, via publication, reporting in results databases, or other data sharing arrangements), including any publication restrictions | <a href="#">Page 18</a>    |
|                               | 31b | Authorship eligibility guidelines and any intended use of professional writers                                                                                                                                                                                                      | <a href="#">Page 18</a>    |

- 31c Plans, if any, for granting public access to the full protocol, participant-level dataset, and statistical code Page 19

### Appendices

- Informed consent materials 32 Model consent form and other related documentation given to participants and authorised surrogates N/A
- Biological specimens 33 Plans for collection, laboratory evaluation, and storage of biological specimens for genetic or molecular analysis in the current trial and for future use in ancillary studies, if applicable N/A

---

\*It is strongly recommended that this checklist be read in conjunction with the SPIRIT 2013 Explanation & Elaboration for important clarification on the items. Amendments to the protocol should be tracked and dated. The SPIRIT checklist is copyrighted by the SPIRIT Group under the Creative Commons "[Attribution-NonCommercial-NoDerivs 3.0 Unported](https://creativecommons.org/licenses/by-nc-nd/3.0/)" license.

**Supplementary File 2: TIDieR-Telehealth checklist**

| <b>Set of Descriptors</b>                                                                                                                                                                                                                                                                                               | <b>Location</b> |
|-------------------------------------------------------------------------------------------------------------------------------------------------------------------------------------------------------------------------------------------------------------------------------------------------------------------------|-----------------|
| <b>BRIEF NAME</b><br>1. Provide the name or a phrase that describes the intervention                                                                                                                                                                                                                                    | Pages<br>9-11   |
| <b>WHY</b><br>2. Describe any rationale, theory, or goal of the elements essential to the intervention                                                                                                                                                                                                                  | Pages<br>9-11   |
| <b>WHAT</b><br>3. Materials: Describe any physical or informational materials used in the intervention, including those provided to participants or used in intervention delivery or in the training of intervention providers. Provide information on where the materials can be accessed (e.g. online appendix, URL). | Pages 9-<br>11  |
| 4. Procedures: Describe each of the procedures, activities, and/or processes used in the intervention, including any enabling or support activities.                                                                                                                                                                    | Pages 9-<br>11  |
| <b>WHO PROVIDED</b><br>5. For each category of intervention provider (e.g. psychologist, nursing assistant), describe their expertise, background and any specific training given.                                                                                                                                      | Pages<br>10-11  |
| <b>HOW</b><br>6. Describe the modes of delivery (e.g., face-to-face or by some other mechanism, such as internet or telephone) of the intervention and whether it was provided individually or in a group.                                                                                                              | Pages<br>10-11  |
| <b>WHERE</b><br>7. Describe the type(s) of location(s) where the intervention occurred, including any necessary infrastructure or relevant features.                                                                                                                                                                    | Page 10         |
| <b>WHEN AND HOW MUCH</b><br>8. Describe the number of times the intervention was delivered and over what period of time including the number of sessions, their schedule, and their duration, intensity or dose.                                                                                                        | Pages<br>9-10   |
| <b>TAILORING</b><br>9. If the intervention was planned to be personalized, titrated or adapted, then describe what, why, when, and how.                                                                                                                                                                                 | Pages<br>10-11  |
| <b>MODIFICATIONS</b><br>10. If the intervention was modified during the course of the study, describe the changes (what, why, when, and how).                                                                                                                                                                           | N/A             |
| <b>HOW WELL</b><br>11. Planned: If intervention adherence or fidelity was assessed, describe how and by whom, and if any strategies were used to maintain or improve fidelity, describe them.                                                                                                                           | Pages<br>10-11  |
| 12. Actual: If intervention adherence or fidelity was assessed, describe the extent to which the intervention was delivered as planned.                                                                                                                                                                                 | N/A             |



**Supplementary File 3: Consensus on Exercise Reporting Template Guidelines Checklist**

| <b>Set of Descriptors</b>                                                               | <b>Location</b> |
|-----------------------------------------------------------------------------------------|-----------------|
| Type of exercise equipment                                                              | Page 10         |
| Qualifications, teaching/supervision expertise, and/or training of exercise instructors | Page 10-11      |
| Whether exercises are performed individually or in a group                              | Page 10         |
| Whether exercise are supervised or unsupervised                                         | Page 10         |
| Measurement and reporting of adherence to exercise                                      | Page 11         |
| Details of motivation strategies                                                        | Page 11         |
| Decision rules for progression the exercise program                                     | Page 11         |
| Each exercise is described so that it can be replicated                                 | Figure 1        |
| Content of any home program component                                                   | Pages 10-11     |
| Nonexercise components                                                                  | Page 10         |
| How adverse events that occur during exercise are documented and managed                | Page 11/18      |
| Setting in which exercises are performed                                                | Page 10         |
| Detailed description of the exercises                                                   | Table 2         |
| Whether exercises are generic (“one size fits all”) or tailors to the individual        | Pages 10-11     |
| Decision rule that determines the starting level for exercise                           | Page 10         |
| Whether the exercise intervention is delivered and performed as planned                 | N/A             |

**Supplementary File 4: Toigo and Boutiller Checklist**

| <b>Set of Descriptors</b>                           | <b>Location</b> |
|-----------------------------------------------------|-----------------|
| Load Management                                     | Table 2         |
| Number of Repetitions                               | Table 2         |
| Number of Sets                                      | Table 2         |
| Rest in-between sets                                | Table 2         |
| Number of exercise interventions                    | Pages 9-10      |
| Duration of experiment                              | Pages 9-10      |
| Fractional and temporal distribution of contraction | Table 2         |
| Rest in-between repetitions                         | Table 2         |
| Time under tension                                  | Table 2         |
| Volitional muscular failure                         | Page 10         |
| Range of Motion                                     | Figure 1        |
| Recovery time in-between exercise sessions          | Table 2         |
| Anatomical definition of exercises                  | Figure 1        |

## Supplementary File 5: REPORT-PFP Checklist

**REPORT-PFP CHECKLIST 2021**

Checklist of strongly recommended and recommended items for quantitative patellofemoral pain studies

| <b>Section 1 – Items Strongly Recommended<br/>(Essential)</b>                                                |                                                                                                                   | <b>Reported on<br/>page # or N/A</b> |
|--------------------------------------------------------------------------------------------------------------|-------------------------------------------------------------------------------------------------------------------|--------------------------------------|
| <b><i>Demographics</i></b>                                                                                   |                                                                                                                   |                                      |
| 1                                                                                                            | Sex or gender of the participants                                                                                 | Page 11                              |
| 2                                                                                                            | Age of the participants                                                                                           | Page 11                              |
| <b><i>Baseline symptoms</i></b>                                                                              |                                                                                                                   |                                      |
| 3                                                                                                            | Symptom duration                                                                                                  | Page 11                              |
| 4                                                                                                            | Pain Severity                                                                                                     | Page 11                              |
| 5                                                                                                            | Unilateral/bilateral symptoms                                                                                     | Page 11                              |
| <b><i>Outcome measures</i></b>                                                                               |                                                                                                                   |                                      |
| 6                                                                                                            | Condition specific patient-reported outcome                                                                       | Page 12                              |
| 7                                                                                                            | Pain severity                                                                                                     | Page 12                              |
| <b><i>Outcome measure description</i></b>                                                                    |                                                                                                                   |                                      |
| 8                                                                                                            | Describe assessment in adequate detail to allow replication                                                       | Pages 8-14                           |
| <b><i>Reporting study results</i></b>                                                                        |                                                                                                                   |                                      |
| 9                                                                                                            | Mean and standard deviation for parametric data                                                                   | N/A                                  |
| 10                                                                                                           | Median and interquartile range for non-parametric data                                                            | N/A                                  |
| 11                                                                                                           | Precision of estimate for all inferential statistics (e.g. 95% confidence interval for between group differences) | N/A                                  |
| <b>Section 2 – Items Recommended<br/>(encouraged but are not required to meet consensus recommendations)</b> |                                                                                                                   | <b>Reported on<br/>page # or N/A</b> |
| <b><i>Demographics</i></b>                                                                                   |                                                                                                                   |                                      |
| 12                                                                                                           | Anthropometrics (including body mass and height or body mass index)                                               | Page 11                              |
| 13                                                                                                           | Physical activity levels                                                                                          | Page 9                               |
| 14                                                                                                           | Source/setting/location of participants                                                                           | Page 8                               |
| 15                                                                                                           | Ethnicity of the participants                                                                                     | Page 11                              |

| <b><i>Baseline symptoms and previous treatment</i></b> |                                                                                                                                                              |                            |
|--------------------------------------------------------|--------------------------------------------------------------------------------------------------------------------------------------------------------------|----------------------------|
| 16                                                     | Previous treatment                                                                                                                                           | Page 11                    |
| 17                                                     | Pain location(s)                                                                                                                                             | Page 11                    |
| 18                                                     | Aggravating factors                                                                                                                                          | Page 11                    |
| 19                                                     | History of knee surgery                                                                                                                                      | Page 11                    |
| 20                                                     | Other symptoms, musculoskeletal symptoms, and comorbidities                                                                                                  | Page 11                    |
| 21                                                     | Crepitus                                                                                                                                                     | Page 11                    |
| 22                                                     | Pain quality                                                                                                                                                 | Page 11                    |
| <b><i>Outcome measures</i></b>                         |                                                                                                                                                              |                            |
| 23                                                     | Physical activity                                                                                                                                            | Page 9                     |
| 24                                                     | Global rating of change                                                                                                                                      | Page 14                    |
| 25                                                     | Health-related quality of life                                                                                                                               | Page 9                     |
| 26                                                     | Psychological factors (including self-efficacy, pain-related fear and pain catastrophising)                                                                  | Page 9                     |
| <b><i>Outcome measure description</i></b>              |                                                                                                                                                              |                            |
| 27                                                     | Provide measurement properties of assessments                                                                                                                | Pages 12-14                |
| 28                                                     | Provide videos and/or images of assessments                                                                                                                  | Figure 1                   |
| <b><i>Clinical trial methodology</i></b>               |                                                                                                                                                              |                            |
| 29                                                     | Follow recommendations from EQUATOR Network <sup>2</sup>                                                                                                     | N/A (Spirit – Supp File 1) |
| 30                                                     | Use existing checklists for interventions, including TIDiER; CERT for exercise interventions; and Toigo and Boutellier for resistance training interventions | Supplementary Files 2-4    |
| 31                                                     | Provide videos and/or images of treatments                                                                                                                   | Figure 1                   |

N/A = not applicable

CERT = Complete Exercise Reporting Template<sup>1</sup>; EQUATOR = Enhancing the QUALity and Transparency Of health Research<sup>2</sup>; TIDiER = Template of Intervention Description and Replication<sup>3</sup>.
